# Supplementary material for: N-Glycans and sulfated glycosaminoglycans contribute to the action of diverse Tc toxins on mammalian cells
Source: PubMed Central journal article supplement (PMC7861375; doi:10.1371/journal.ppat.1009244), 2021-02-04
Supplement: ppat.1009244.s012.pdf [file ppat.1009244.s012.pdf]

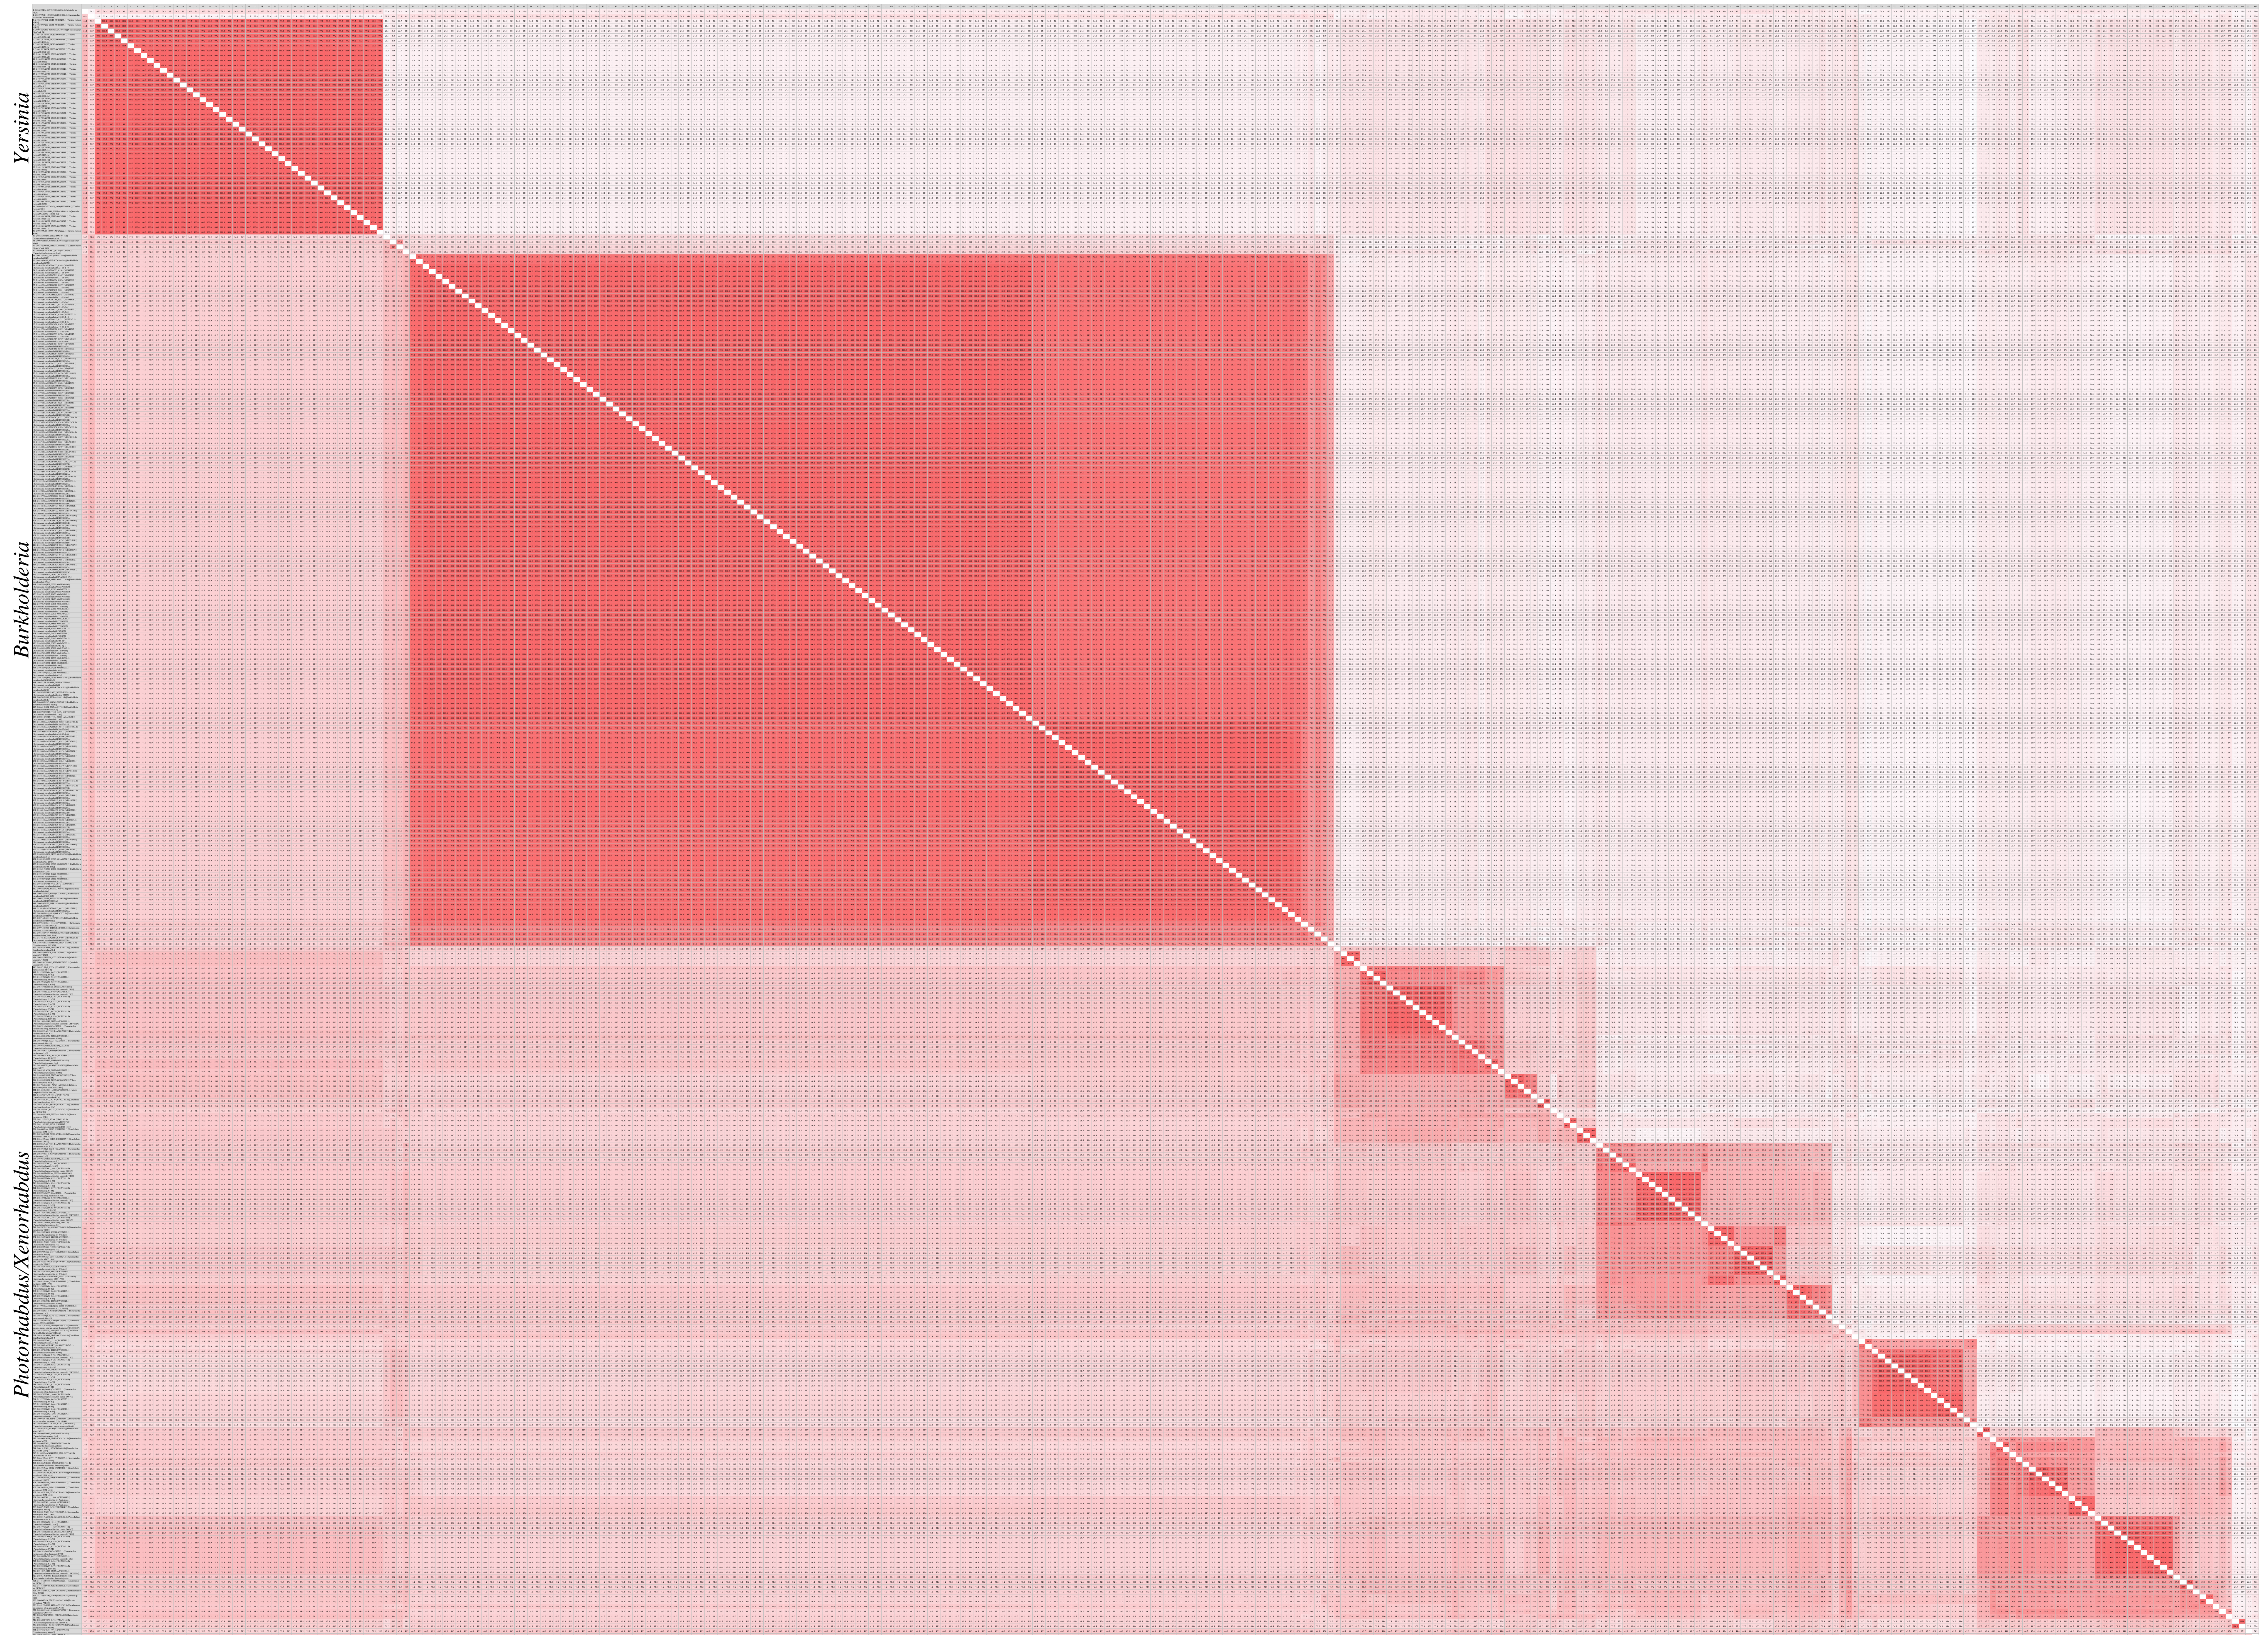

Note: pairwise amino acids comparison, upper triangle, sequence identity; lower triangle, sequence similarity.
